# Supplementary material for: Combined Effects of Drought and Soil Fertility on the Synthesis of Vitamins in Green Leafy Vegetables
Source: MDPI journal article supplement (doi:10.3390/agriculture13050984), 2023-04-29
Supplement: s1 [file s1]

## Supplementary Materials

Table S1. Mean temperature and humidity of the greenhouse and the first growing season (the data recorded from the 21<sup>st</sup> of April to the 2<sup>nd</sup> of August in 2019) of the project areas in Uganda and Kenya.

|                  | Kapchorwa, Uganda | Teso South, Kenya | The greenhouse trial |
|------------------|-------------------|-------------------|----------------------|
| Mean temperature | 19.7 °C           | 23.8 °C           | 22 °C                |
| Mean humidity    | 80.7%             | 82.1%             | 50.3%                |

Table S2: The gravimetric amount of 100% pot capacity (PC), 75% PC, 50% PC, 25% PC, and a single pot with two soil types (fertile soil; cambisol and infertile soil; alisol).

| Soil type                 | 100% PC<br>(g pot <sup>-1</sup> ) | 75% PC<br>(g pot <sup>-1</sup> ) | 50% PC<br>(g pot <sup>-1</sup> ) | 25% PC<br>(g pot <sup>-1</sup> ) | Pot with dried<br>soil (g) |
|---------------------------|-----------------------------------|----------------------------------|----------------------------------|----------------------------------|----------------------------|
| Fertile soil;<br>cambisol | 893                               | 670                              | 447                              | 223                              | 8000                       |
| Infertile soil;<br>alisol | 1395                              | 1046                             | 697                              | 349                              | 8000                       |

Table S3. Summary of chemical properties of collected soil samples in Tauchenweiler and Höwenegg, Germany (Stahr & Böcker, 2014).

|                                | Infertile soil (S)                 | Fertile soil (L)                  |
|--------------------------------|------------------------------------|-----------------------------------|
|                                | Endostagnic Alisol (Tauchenweiler) | Endoleptic Cambisol (Höwenegg)    |
| S-value* (mol/m <sup>2</sup> ) | 2.38                               | 121                               |
| Mg (kg/m <sup>2</sup> )        | 0.93                               | 8.3                               |
| Ca (kg/m <sup>2</sup> )        | 0.05                               | 3.7                               |
| P (kg/m <sup>2</sup> )         | <0.002                             | 0.99                              |
| K (kg/m <sup>2</sup> )         | 1.3                                | 1.74                              |
| N (kg/m <sup>2</sup> )         | 0.49                               | 0.73                              |
| Humus (kg/m <sup>2</sup> )     | 9.8                                | 14.6                              |
| pH (CaCl <sub>2</sub> )        | 4.0                                | 5.6                               |
| Soil texture**                 | A mixture of Lt2 and Ls4           | A mixture of Ls2, Lu, TI, and Tu2 |

\*S-value: Sum of exchangeable alkaline cations

\*\*Soil texture: Lt2 (weakly clayey loam), Ls2 (weakly sandy loam), Ls4 (strongly sandy loam), Lu (silty loam), TI (loamy clay), and Tu2 (weakly sandy clay) (Bormann, 2007)

|                |          |          |          |                |          |          |          |
|----------------|----------|----------|----------|----------------|----------|----------|----------|
| <b>Block 1</b> |          |          |          | <b>Block 4</b> |          |          |          |
| SW-L-DC2       | SW-S-DC2 | BN-S-DC  | BN-L-DS  | CP-S-DM        | CP-S-DC2 | CP-L-DC  | CP-L-DC2 |
| SW-L-DS        | BN-S-DS  | CP-S-DC  | CP-L-DM  | CP-L-DM        | CP-S-DS  | CP-L-DS  | SW-L-DC2 |
| BN-L-DC2       | BN-S-DM  | BN-S-DC2 | CP-L-DC  | SW-L-DS        | SW-S-DS  | CP-S-DC  | BN-L-DM  |
| CP-S-DC2       | CP-S-DM  | SW-L-DC  | SW-S-DM  | BN-L-DC2       | BN-S-DS  | SW-L-DM  | SW-S-DM  |
| CP-L-DC2       | CP-S-DS  | CP-L-DS  | BN-L-DM  | BN-S-DC2       | SW-S-DC  | SW-L-DC  | SW-S-DC2 |
| BN-L-DC        | SW-S-DS  | SW-L-DM  | SW-S-DC  | BN-S-DC        | BN-L-DS  | BN-L-DC  | BN-S-DM  |
| <b>Block 2</b> |          |          |          | <b>Block 5</b> |          |          |          |
| CP-S-DC        | SW-S-DC2 | SW-L-DS  | BN-L-DS  | BN-L-DC        | CP-L-DC2 | SW-S-DC  | BN-S-DS  |
| BN-S-DM        | BN-L-DC2 | BN-S-DC2 | SW-L-DC2 | BN-L-DM        | CP-L-DC  | SW-L-DS  | BN-S-DC  |
| BN-S-DS        | SW-S-DS  | CP-L-DM  | SW-S-DC  | SW-S-DC2       | CP-S-DM  | CP-S-DC2 | BN-S-DC2 |
| CP-L-DC        | CP-L-DS  | CP-S-DM  | BN-L-DC  | CP-L-DM        | SW-L-DM  | BN-S-DM  | CP-S-DS  |
| CP-L-DC2       | SW-L-DM  | SW-L-DC  | BN-L-DM  | SW-L-DC        | CP-L-DS  | BN-L-DC2 | BN-L-DS  |
| BN-S-DC        | CP-S-DS  | SW-S-DM  | CP-S-DC2 | SW-S-DM        | CP-S-DC  | SW-S-DS  | SW-L-DC2 |
| <b>Block 3</b> |          |          |          | <b>Block 6</b> |          |          |          |
| BN-S-DS        | CP-S-DC  | BN-L-DM  | BN-L-DC  | BN-L-DS        | SW-S-DS  | SW-L-DC2 | BN-L-DC  |
| CP-S-DS        | SW-L-DC  | BN-S-DM  | CP-L-DC2 | CP-S-DC2       | BN-L-DM  | CP-L-DS  | CP-S-DM  |
| CP-S-DM        | CP-L-DC  | SW-S-DS  | BN-S-DC  | CP-L-DM        | CP-S-DC  | BN-S-DC  | BN-S-DC2 |
| CP-L-DM        | SW-L-DM  | SW-S-DC2 | SW-S-DC  | SW-S-DM        | SW-L-DS  | BN-S-DM  | BN-S-DS  |
| CP-S-DC2       | SW-L-DC2 | BN-L-DS  | BN-S-DC2 | SW-L-DC        | CP-S-DS  | CP-L-DC2 | SW-S-DC  |
| CP-L-DS        | CP-S-DS  | SW-S-DM  | SW-L-DS  | SW-L-DM        | SW-S-DC2 | BN-L-DC2 | CP-L-DC  |

Figure S1: A sample layout of a 4 \* 6 factorial experiment involving three species (SW: *B. oleracea*, CP: *Vigna unguiculata*, and BN: *S. scabrum*), two soil fertility (L: fertile soil and S: unfertile soil), and two drought treatment with a double number of the control (DC: drought control, DM: drought mild, and DS: drought severe) in a randomized complete block design (RCBD) with six replications. The layout was designed using the SAS program.

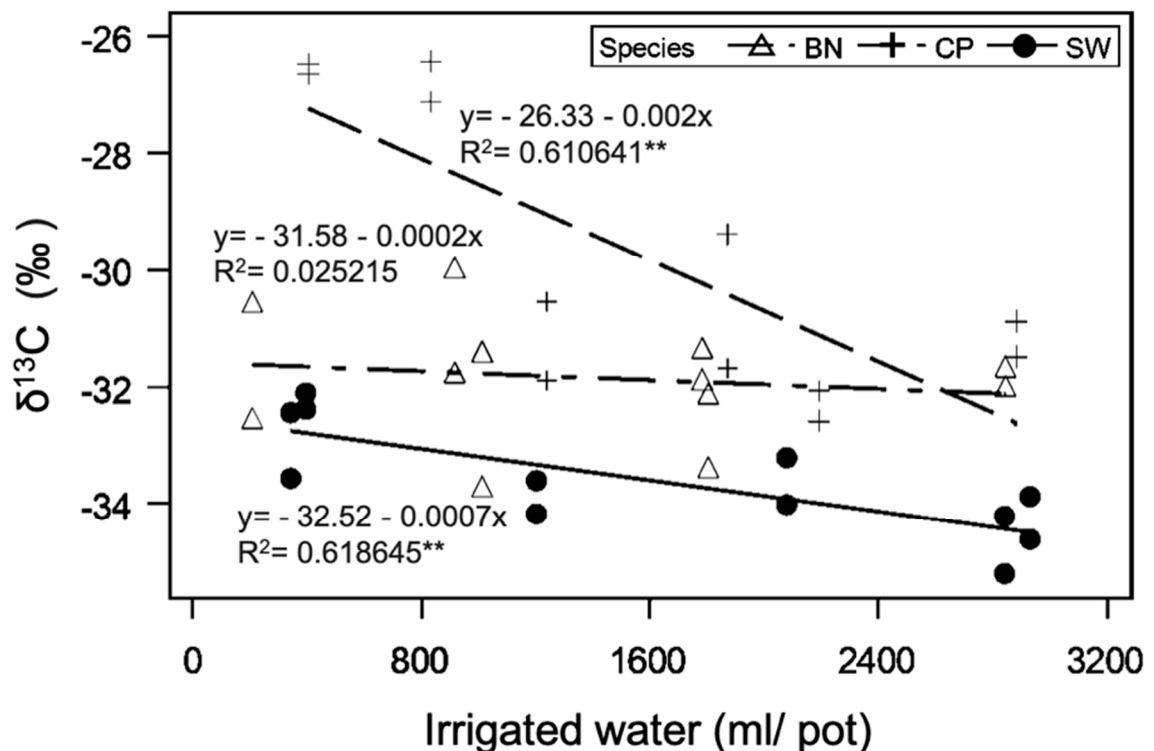

Figure S2. δ<sup>13</sup>C measurements of samples of *B. oleracea* (SW, ●), *V. unguiculata* (CP, +), and *S. scabrum* (BN, Δ) according to the mean of irrigated water amount for each treatment in the greenhouse trial (n=4 per pot capacity of species). Regression respective formula and R<sup>2</sup> are given. The triple asterisk indicates significance at  $p < 0.001$ .
